# Supplementary material for: Gene Expression Profiling Reveals That PXR Activation Inhibits Hepatic PPAR&alpha; Activity and Decreases FGF21 Secretion in Male C57Bl6/J Mice
Source: Preprints.org preprint supplement (doi:10.20944/preprints201907.0069.v1), 2019-07-03
Supplement: Supplementary file 1 [file SuppTable1.docx]

**SUPPLEMENTARY INFORMATION FOR**

**Gene expression profiling reveals that PXR activation inhibits hepatic PPARα activity and decreases FGF21 secretion in male C57Bl6/J mice**

Sharon Ann Barretto 1,*, Frederic Lasserre 1,* , Anne Fougerat 1, Lorraine Smith 1, Tiffany Fougeray 1, , Celine Lukowicz 1, Arnaud Polizzi 1, Sarra Smati 1 , Marion Régnier 1, Claire Naylies 1, Colette Bétoulières 1, Yannick Lippi 1 , Hervé Guillou 1, Nicolas Loiseau 1, Laurence Gamet-Payrastre 1 , Laila Mselli-Lakhal 1 and Sandrine Ellero-Simatos 1,*

Supplementary Table 1: Primers used for qPCR

Supplementary Table 2: Gene Enrichment Analysis on the 1029 hepatic genes induced by PCN-treatment only in WT mice (prototypical *Pxr* target genes, fold-change>1.5 & adjusted p-value<0.05) in the liver.

Supplementary Table 3: Gene Enrichment Analysis on the 179 ileal genes induced by PCN-treatment only in WT mice (prototypical *Pxr* target genes, fold-change>1.2 & adjusted p-value<0.05) in the ileum.

Supplementary Table 4: Impact on PCN treatment on all XMEs in the liver and in the ileum.

Supplementary Table 5: Gene Enrichment Analysis on the 186 genes repressed by PCN-treatment only in WT mice (prototypical Pxr target genes, fold-change<-1.5 & adjusted p-value<0.05) in the liver.

Supplementary Table 1Oligonucleotide sequences for real-time PCR

|  |  |  |  | |
| --- | --- | --- | --- | --- |
| **Gene** | **NCBI Refseq** | **Forward primer (5'-3')** | **Reverse primer (5'-3')** |
|  |  |  |  | |
| *Acot1* | NM_012006 | CGATGACCTCCCCAAGAACA | CCCAAGCAGCCCAATTCC | |
|  |  |  |  | |
| *Bmal1* | [NM_007489](https://www.ncbi.nlm.nih.gov/nuccore/NM_000773.3) | CAAACTACAAGCCAACATTTCTATCAG | TCGGTCACATCCTACGACAAAC | |
|  |  |  |  | |
| *Cyp2c55* | AY206875 | TTGTGGAAGAGCTAAGAAAAGCAAAT | GAGCACAGCTCAGGATGAATGT | |
|  |  |  |  | |
| *Cyp3a11* | NM_007818 | TCACACACACAGTTGTAGGCAGAA | GTTTACGAGTCCCATATCGGTAGAG | |
|  |  |  |  | |
| *Cyp4a10* | NM_010011 | ATTAGTGAGAGTGAGGACAGCAACAG | CCAACCCGATTTGCAGACA | |
|  |  |  |  | |
| *Cyp4a14* | NM_007822 | TCAGTCTATTTCTGGTGCTGTTC | GAGCTCCTTGTCCTTCAGATGGT | |
|  |  |  |  | |
| *Fgf21* | [NM_020013](https://www.ncbi.nlm.nih.gov/nuccore/NM_018667.3) | AAAGCCTCTAGGTTTCTTTGCCA | CCTCAGGATCAAAGTGAGGCG | |
|  |  |  |  | |
| *Pxr* | NM_010936 | AGAGATCATCCCTCTTCTGCCAC | GATCTGGTCCTCAATAGGCAGGT | |
|  |  |  |  | |
| *Rev-erbα* | NM_145434 | CAGCTGGTGAAGACATGACGAC | GGAGGAGCCACTAGAGCCAA | |
|  |  |  |  | |
| *Pparα* | NM_011144 | CCCTGTTTGTGGCTGCTATAATTT | GGGAAGAGGAAGGTGTCATCTG | |
|  |  |  |  | |
|  |  |  |  | |
