# Supplementary material for: Gene Expression Profiling Reveals That PXR Activation Inhibits Hepatic PPAR&alpha; Activity and Decreases FGF21 Secretion in Male C57Bl6/J Mice
Source: Preprints.org preprint supplement (doi:10.20944/preprints201907.0069.v1), 2019-07-03
Supplement: Supplementary file 2 [file SuppTables2-4.xlsx]

## Sheet: SuppTable2
Cluster number	Enrichment score	Adjusted P-value	Ontology		Gene count	Genes
1	6.94	1.5e-09	mitosis	Up_keywords	41	BUB1B, mitotic checkpoint serine/threonine kinase(Bub1b);CTF18, chromosome transmission fidelity factor 18(Chtf18);E2F transcription factor 7(E2f7);Fanconi anemia, complementation group I(Fanci);H2A histone family, member X(H2afx);H2A histone family, member Y3(H2afy3);H2B histone family, member M(H2bfm);MAD1 mitotic arrest deficient 1-like 1(Mad1l1);MAD2 mitotic arrest deficient-like 1(Mad2l1);MA…
		2.4e-08	cell cycle	Up_keywords	67
		2.2e-07	cell division	Goterm_BP_direct	46
2	4.75	2.1e-06	Glutathione metabolism	Kegg_pathway	18	SH3 domain binding glutamic acid-rich protein-like 3(Sh3bgrl3);UDP glucuronosyltransferase 1 family, polypeptide A6B(Ugt1a6b);UDP glucuronosyltransferase 2 family, polypeptide A1(Ugt2a1);UDP glucuronosyltransferase 2 family, polypeptide B34(Ugt2b34);UDP glucuronosyltransferase 2 family, polypeptide B35(Ugt2b35);UDP glycosyltransferase 1 family, polypeptide A10(Ugt1a10);alanyl (membrane) aminopept…
		2.7e-06	Metabolism of xenobiotics by cytochrome P450	Kegg_pathway	19
		0.0014	Drug metabolism - CYP450	Kegg_pathway	15
3	4.45	8.8e-05	Glycoprotein	Up-keywords	233
		0.0004	Disulfide bound	Up_keywords	192
		0.0076	Signal	Up_keywords	253
4	4.41	4.2e-06	Retinol metabolism	Kegg_pathway	22	UDP glucuronosyltransferase 1 family, polypeptide A6B(Ugt1a6b);UDP glucuronosyltransferase 2 family, polypeptide A1(Ugt2a1);UDP glucuronosyltransferase 2 family, polypeptide B34(Ugt2b34);UDP glucuronosyltransferase 2 family, polypeptide B35(Ugt2b35);UDP glycosyltransferase 1 family, polypeptide A10(Ugt1a10);alcohol dehydrogenase 1 (class I)(Adh1);aldehyde dehydrogenase family 1, subfamily A1(Aldh…
		0.00024	Microsome	Up_keywords	20
		0.00025	Monooxygenase	Up_keywords	20
5	3.55	0.00091	Lipid metabolism	Up_keywords	39	1-acylglycerol-3-phosphate O-acyltransferase 4 (lysophosphatidic acid acyltransferase, delta)(Agpat4);2-hydroxyacyl-CoA lyase 1(Hacl1);3-hydroxyacyl-CoA dehydratase 4(Hacd4);7-dehydrocholesterol reductase(Dhcr7);ELOVL family member 6, elongation of long chain fatty acids (yeast)(Elovl6);ER lipid raft associated 1(Erlin1);JAZF zinc finger 1(Jazf1);abhydrolase domain containing 5(Abhd5);acetyl-Coen…
		0.013	Lipid biosynthesis	Up_keywords	18
6	3.05	5.5e-06	Chemotaxis	Goterm_BP_direct	25	BMP-binding endothelial regulator(Bmper);CCAAT/enhancer binding protein (C/EBP), beta(Cebpb);FGR proto-oncogene, Src family tyrosine kinase(Fgr);FMS-like tyrosine kinase 1(Flt1);Fc receptor, IgE, high affinity I, gamma polypeptide(Fcer1g);GLI pathogenesis-related 2(Glipr2);NAD(P)H dehydrogenase, quinone 2(Nqo2);RAS-related C3 botulinum substrate 2(Rac2);Rap guanine nucleotide exchange factor (GEF…
		4.7e-05	Positive regulation of inflammatory response	Goterm_BP_direct	17
7	2.56	0.002	Collagen	Up_keywords	14	ATPase, Na+/K+ transporting, alpha 3 polypeptide(Atp1a3);C1q and tumor necrosis factor related protein 6(C1qtnf6);C1q and tumor necrosis factor related protein 7(C1qtnf7);ankyrin repeat and SOCS box-containing 4(Asb4);collagen triple helix repeat containing 1(Cthrc1);collagen, type II, alpha 1(Col2a1);collagen, type IV, alpha 1(Col4a1);collagen, type IV, alpha 2(Col4a2);collagen, type V, alpha 1(…

## Sheet: SuppTable3
			LIVER
		GeneName	log2FC_WTPCN-WTCtl	log2FC_PXRKOPCN-PXRKOCtl	adj.P.Val_WTPCN-WTCtl	adj.P.Val_PXRKOPCN-PXRKOCtl
Phase I	Cyptochomes P450	Cyp17a1	-0.206803	-0.18602	0.354595	0.552695
		Cyp1a1	0.0150853	-0.297076	0.954617	0.256129
		Cyp1a2	0.28497	0.892329	0.381205	0.0174374
		Cyp1b1	0.960031	0.402675	0.000545541	0.214793
		Cyp20a1	0.405487	-0.0209247	0.071042	0.96546
		Cyp21a1	0.517171	1.00449	0.168059	0.0258268
		Cyp26a1	1.59951	-1.44231	0.00135701	0.0119282
		Cyp26b1	-2.63399	0.610471	0.000398851	0.534259
		Cyp27a1	0.576389	0.704424	0.043421	0.0404208
		Cyp2a12	-0.0440511	-0.0798199	0.864933	0.829474
		Cyp2a22	0.798534	0.367634	0.0282281	0.472005
		Cyp2a4	1.04335	0.148334	0.0031861	0.80053
		Cyp2a5	0.632829	0.0596172	0.00478295	0.885231
		Cyp2b10	6.94253	1.61841	1.30657e-07	0.167757
		Cyp2b9	6.59115	1.46426	8.19306e-08	0.176379
		Cyp2c29	1.12736	0.400808	5.21667e-06	0.0946614
		Cyp2c37	0.184626	0.508034	0.596006	0.201336
		Cyp2c38	2.07039	0.60504	5.33967e-09	0.0311444
		Cyp2c40	-0.0903742	-0.0314999	0.772898	0.955515
		Cyp2c44	-0.258923	0.104539	0.171982	0.736869
		Cyp2c50	0.505239	0.0451208	0.133334	0.948934
		Cyp2c53-ps	1.25752	0.18953	0.00330493	0.787237
		Cyp2c54	0.333109	0.554725	0.284557	0.141533
		Cyp2c55	6.41838	0.58684	2.02943e-14	0.18523
		Cyp2c65
		Cyp2c66	0.261236	0.103839	0.110716	0.692328
		Cyp2c67	-0.367517	-0.259385	0.114216	0.416456
		Cyp2c68	-0.276307	-0.17962	0.22887	0.59563
		Cyp2c69	-0.352255	-0.188953	0.130732	0.585741
		Cyp2c70	0.233273	0.0354861	0.352547	0.943314
		Cyp2d10	0.0983744	0.00733977	0.553842	0.982179
		Cyp2d11	0.0748485	0.0906494	0.780697	0.820511
		Cyp2d12	0.183774	0.265997	0.46866	0.413052
		Cyp2d13	-0.392581	0.0835572	0.0925626	0.842079
		Cyp2d22	0.394642	0.241028	0.0648052	0.409705
		Cyp2d26	0.213806	0.246757	0.394147	0.459332
		Cyp2d34	0.393907	0.383072	0.43701	0.591308
		Cyp2d37-ps	-0.202503	0.121086	0.346151	0.719045
		Cyp2d40	-0.564947	0.157174	0.110264	0.79536
		Cyp2d9	0.339208	0.357744	0.478005	0.591308
		Cyp2e1	0.0711942	0.285753	0.741251	0.223266
		Cyp2f2	0.0269206	-0.379666	0.882047	0.0288759
		Cyp2g1	1.2384	-0.347174	0.00320917	0.559516
		Cyp2j13	0.348205	0.29007	0.0518713	0.2001
		Cyp2j5	0.251107	0.265593	0.0532012	0.0952915
		Cyp2j6	0.306052	0.327403	0.127051	0.196735
		Cyp2j8	0.294717	0.246888	0.0408278	0.171781
		Cyp2j9	-0.576889	-0.277673	0.0219599	0.420137
		Cyp2r1	-0.0408508	-0.109372	0.817684	0.623315
		Cyp2s1	-0.0725746	0.667657	0.911222	0.317037
		Cyp2t4	0.0847174	0.0153894	0.551667	0.955967
		Cyp2u1	-1.07745	-0.444907	6.31752e-07	0.0223663
		Cyp2w1	0.362964	0.163422	0.0222444	0.459332
		Cyp39a1	-0.474061	-0.00722076	0.291259	0.994971
		Cyp3a11	3.64182	0.358158	2.08119e-10	0.451653
		Cyp3a13	0.221618	0.213692	0.2206	0.373615
		Cyp3a16	3.32931	0.284626	1.53923e-10	0.520464
		Cyp3a25	1.58519	0.0225782	8.26318e-09	0.953468
		Cyp3a41a	1.70642	0.215876	6.99747e-07	0.569461
		Cyp3a44	1.24086	0.0361191	1.56391e-06	0.927439
		Cyp3a57	1.75689	0.0210395	1.75989e-09	0.957597
		Cyp3a59	2.77815	0.275681	2.05667e-11	0.36829
		Cyp46a1	-0.0328929	-0.276559	0.928741	0.492763
		Cyp4a10	-1.53861	-0.859828	0.00178934	0.139267
		Cyp4a12a	-0.118337	-0.523849	0.844263	0.440376
		Cyp4a12b	-0.0307932	-0.472899	0.961399	0.50389
		Cyp4a14	-0.919061	-0.148061	0.0412275	0.864626
		Cyp4a31	-1.74065	-1.06255	0.00207641	0.109924
		Cyp4b1	-0.622597	-0.027697	0.00412617	0.950325
		Cyp4f13	-0.277116	-0.140918	0.0715664	0.525702
		Cyp4f14	0.334782	-0.124625	0.0657999	0.661723
		Cyp4f15	0.37091	0.244264	0.0231046	0.239941
		Cyp4f16	0.557896	0.0754458	0.00139362	0.787719
		Cyp4f17	0.234884	0.175173	0.0665494	0.294719
		Cyp4f18	0.880541	0.378664	2.13683e-05	0.0662178
		Cyp4f40
		Cyp4f41-ps	0.223595	0.0420411	0.0964013	0.865671
		Cyp4v3	-0.469172	0.130223	0.00874212	0.629074
		Cyp4x1
		Cyp51	0.130264	0.316857	0.628337	0.317592
		Cyp7a1	-0.295303	0.283543	0.282539	0.44724
		Cyp7b1	-0.374329	0.166108	0.475688	0.852345
		Cyp8b1	1.21042	-0.291016	0.0525358	0.783626
	Alcohol dehydrogenases	Adh1	0.60023	0.369248	0.00375224	0.137036
		Adh4	-0.524856	-0.294555	0.00846597	0.239073
		Adh5	0.195551	0.195261	0.152699	0.266332
		Adh6-ps1	-0.843142	-0.535168	0.0112625	0.197442
		Adh6a	0.516158	0.00314119	0.15045	0.997547
		Adh7	0.389171	0.155519	0.0349832	0.56747
	Aldo-keto reductases	Akr1a1	0.151822	0.0678642	0.237742	0.74798
		Akr1b10	0.379501	0.140856	0.135676	0.737182
		Akr1b3	0.752638	0.262757	0.000783503	0.342913
		Akr1b7	4.87131	0.52155	6.62972e-10	0.436451
		Akr1b8	0.214352	0.315003	0.307545	0.224196
		Akr1c12	0.116345	0.125827	0.450119	0.552247
		Akr1c13	0.109481	0.114657	0.472702	0.589416
		Akr1c14	0.292351	-0.0666042	0.260257	0.889885
		Akr1c18	0.31039	-0.238191	0.145502	0.413052
		Akr1c19	0.363772	0.295897	0.140156	0.371792
		Akr1c20	0.277471	0.432418	0.0736718	0.0208256
		Akr1c6	0.249984	0.36305	0.0928197	0.0432932
		Akr1cl	1.41313	-0.0594303	0.260783	0.982179
		Akr1d1	1.73947	0.74668	2.76865e-06	0.0318816
		Akr1e1	0.274727	0.0319094	0.0859598	0.920262
		Akr7a5	0.304051	-0.044465	0.071945	0.889551
	Aldehyde dehydrogenases	Aldh16a1	0.140835	0.0917348	0.410117	0.731867
		Aldh18a1	0.612931	0.293618	0.00124796	0.194223
		Aldh1a1	0.875041	0.245844	0.000102213	0.343165
		Aldh1a2	0.539263	0.650636	0.0727597	0.0765499
		Aldh1a3	1.60341	0.564726	1.31866e-06	0.0646244
		Aldh1a7	1.1109	0.471555	1.13334e-05	0.0562276
		Aldh1b1	1.38065	0.148553	0.000682648	0.822784
		Aldh1l1	0.364604	0.0870473	0.090536	0.818183
		Aldh1l2
		Aldh2	0.354373	0.224476	0.144394	0.519621
		Aldh3a1	0.0778137	0.00394244	0.542351	0.988704
		Aldh3a2	-0.452969	-0.116042	0.0720282	0.786602
		Aldh3b1	0.263835	-0.0939996	0.235423	0.803557
		Aldh3b2
		Aldh3b3	0.112742	0.137295	0.383294	0.417259
		Aldh4a1	0.710558	0.421964	5.79889e-05	0.0200421
		Aldh5a1	0.0217687	-0.217054	0.90784	0.24847
		Aldh6a1	-0.0215437	-0.0549613	0.904954	0.824089
		Aldh7a1	0.391414	0.131132	0.0228533	0.614626
		Aldh8a1	0.367124	0.0924102	0.11509	0.822251
		Aldh9a1	0.23403	0.160277	0.321567	0.651569
	Carboxylesterases	Ces1b	0.0477419	0.456331	0.870278	0.111249
		Ces1c	0.590264	0.271994	0.00034409	0.142563
		Ces1d	1.28331	0.46577	0.000234403	0.242322
		Ces1e	0.234798	-0.462957	0.415525	0.177803
		Ces1f	0.117093	-0.048241	0.460154	0.860346
		Ces1g	1.26331	0.980869	0.000235613	0.00880857
		Ces2a	3.559	0.751667	3.17347e-13	0.00777819
		Ces2b	1.22239	1.00881	0.0154575	0.101222
		Ces2c	1.11787	1.01328	0.0209954	0.0866117
		Ces2e	0.0935811	-0.213881	0.751026	0.563395
		Ces2f	3.04404	0.526952	6.12188e-13	0.0329931
		Ces2g	1.12555	0.18669	6.27969e-07	0.419284
		Ces3a	0.10535	0.0722855	0.351583	0.673165
		Ces3b	0.29792	0.254354	0.342655	0.568073
		Ces4a	-0.808671	-0.385175	0.0552096	0.52717
Phase II	Glutathione S-transferases	Gsta2	2.78776	0.588367	0.00046201	0.587534
		Gsta3	0.537195	-0.00537424	0.00224026	0.989163
		Gsta4	1.3433	-0.329835	0.000110056	0.427964
		Gstcd	0.375559	-0.0133305	0.0205223	0.968306
		Gstk1	-0.0948849	-0.271968	0.497922	0.0882339
		Gstm1	2.14168	0.299105	5.88164e-08	0.430782
		Gstm2	2.59749	0.830851	7.33224e-09	0.0203189
		Gstm3	1.75646	0.308026	4.91419e-08	0.288646
		Gstm4	2.63822	0.382753	7.42752e-10	0.260598
		Gstm5	0.590494	0.156908	0.000286784	0.439379
		Gstm6	2.35448	0.496301	1.58144e-09	0.100503
		Gstm7	0.550761	-0.0145348	0.00811989	0.973482
		Gsto1	0.29593	0.00987704	0.0544175	0.97629
		Gsto2	0.167039	0.157021	0.348072	0.525145
		Gstp1	0.143105	0.0577608	0.447499	0.859163
		Gstp2	0.0485661	-0.0573127	0.653251	0.710844
		Gstt1	0.296799	0.00654331	0.0657096	0.985227
		Gstt2	-1.14958	-0.819328	0.00467493	0.090948
		Gstt3	1.75803	0.118087	1.43688e-06	0.806377
		Gstz1	0.0643007	0.0575779	0.662205	0.795264
	Sulfotransferases	Sult1a1	0.579255	0.391068	0.0200488	0.214513
		Sult1b1	0.532068	0.309087	0.0207943	0.303501
		Sult1c1	-0.223799	0.165974	0.212305	0.514914
		Sult1c2	0.294175	-0.566026	0.223139	0.048616
		Sult1d1	0.892654	0.40964	0.000869292	0.195046
		Sult1e1	1.30164	0.691075	0.00111676	0.137484
		Sult2a7	2.38518	-0.0276855	6.42188e-05	0.979818
		Sult2a8	-0.427782	0.126584	0.110437	0.780375
		Sult2b1
		Sult4a1	0.32795	0.0039641	0.00856747	0.989092
		Sult5a1	0.550645	-0.164758	0.107094	0.775619
	UDP glycosyltransferases	Ugt1a10	1.66278	0.0701382	0.0324402	0.966054
		Ugt1a6a	0.0770237	-0.203695	0.826664	0.64988
		Ugt1a6b	0.926588	0.343131	8.45118e-05	0.178423
		Ugt2a1	0.762968	0.0411191	0.000139508	0.903145
		Ugt2a3	-0.013078	-0.0978065	0.9458	0.682471
		Ugt2b1	0.443028	-0.631957	0.1302	0.0775481
		Ugt2b34	0.843217	0.046674	0.000112842	0.898381
		Ugt2b35	0.932622	0.00595684	5.93172e-05	0.989754
		Ugt2b36	0.186471	-0.128467	0.249643	0.587304
		Ugt2b37	0.0157384	-0.22054	0.955989	0.478431
		Ugt2b38	-0.0501947	-0.223674	0.810548	0.331294
		Ugt2b5	0.0226185	-0.180353	0.932389	0.547467
		Ugt3a1	-0.00242723	0.17039	0.991728	0.499361
		Ugt3a2	0.131504	0.199473	0.473132	0.390165
Phase III	ATP-binding cassettes	Abca1	0.440683	0.309013	0.0144208	0.166707
		Abca12
		Abca14
		Abca17	0.0552878	0.178015	0.854609	0.635858
		Abca2	0.287052	-0.349608	0.165204	0.175615
		Abca3	0.114173	-0.00619599	0.439807	0.983433
		Abca4	0.160468	0.095187	0.356233	0.728618
		Abca5	-0.0746563	-0.286948	0.79083	0.366341
		Abca6	0.200176	0.215136	0.226546	0.316096
		Abca7	-0.235052	-0.101479	0.0869946	0.630066
		Abca8a	-0.133276	0.365534	0.546098	0.146049
		Abca8b	0.274073	0.312932	0.282627	0.345116
		Abca9	0.302202	0.173316	0.101988	0.514407
		Abcb10	-0.20345	-0.49365	0.225739	0.0141403
		Abcb11	0.545336	0.0901911	0.00698156	0.788491
		Abcb1a	1.44207	-0.129297	0.000277031	0.840098
		Abcb1b	0.617633	0.486609	0.0116125	0.101238
		Abcb4	-0.569112	-0.654123	0.000180635	0.000458236
		Abcb6	-0.0867094	0.0505289	0.55276	0.831792
		Abcb7	0.0547226	0.0170259	0.716642	0.950534
		Abcb8	0.384312	-0.0159075	0.0429194	0.967784
		Abcb9	-0.213846	-0.253482	0.355091	0.402015
		Abcc1	-0.369949	-0.291201	0.00325289	0.0466859
		Abcc10	-0.0889033	-0.227745	0.59357	0.234739
		Abcc12	-0.200426	0.0685507	0.533917	0.904928
		Abcc2	0.47545	0.0752023	0.00465799	0.786602
		Abcc3	1.59654	0.427519	2.78461e-09	0.0404208
		Abcc4	0.296487	0.337473	0.0556544	0.0743625
		Abcc5	0.194032	0.114154	0.298651	0.695352
		Abcc6	-0.14949	-0.00875654	0.289362	0.976437
		Abcc8
		Abcc9	0.0672612	0.147178	0.77393	0.626041
		Abcd1	0.524418	0.376382	0.0292833	0.218321
		Abcd2	1.15088	-0.581421	0.0553426	0.497931
		Abcd3	-0.168306	-0.0227889	0.359706	0.951057
		Abcd4	0.208155	0.223983	0.328295	0.428449
		Abce1	0.314128	0.141601	0.0630605	0.57033
		Abcf1	0.505898	0.379056	0.0785933	0.316943
		Abcf2	0.174684	0.109048	0.525794	0.803588
		Abcf3	0.386726	0.246602	0.0149958	0.218747
		Abcg1	0.409712	0.391225	0.0656788	0.159118
		Abcg2	0.184401	0.135257	0.352568	0.646382
		Abcg3	0.345862	0.0458054	0.224527	0.936437
		Abcg4	0.879814	-0.115468	0.000975509	0.7859
		Abcg5	0.300682	-0.112332	0.048115	0.629272
		Abcg8	-0.0188675	-0.218606	0.928458	0.301612

## Sheet: SuppTable4
Cluster number	Enrichment score	Adjusted P-value	Ontology		Gene count	Genes
1	10.1	9.7e-18	chemical carcinogenesis	Kegg_pathway	20	UDP glucuronosyltransferase 1 family, polypeptide A 6B(Ugt1a6b);UDP glucuronosyltransferase 2 family, polypeptide A 3(Ugt2a3);cytochrome P450, family 2, subfamily b, polypeptide 10(Cyp2b10);cytochrome P450, family 2, subfamily b, polypeptide 9(Cyp2b9);cytochrome P450, family 2, subfamily c, polypeptide 55(Cyp2c55);cytochrome P450, family 2, subfamily c, polypeptide 65(Cyp2c65);cytochrome P450, fa…
		9.2e-07	Metabolism of xenobiotics by cytochrome P450	Kegg_pathway	10
		4.2e-05	Glutathione metabolism	Kegg_pathway	8
2	8.1	9.7e-18	Chemical carcinogenesis	Kegg_pathway	20	UDP glucuronosyltransferase 1 family, polypeptide A 6B(Ugt1a6b);UDP glucuronosyltransferase 2 family, polypeptide A 3(Ugt2a3);cytochrome P450, family 2, subfamily b, polypeptide 10(Cyp2b10);cytochrome P450, family 2, subfamily b, polypeptide 9(Cyp2b9);cytochrome P450, family 2, subfamily c, polypeptide 55(Cyp2c55);cytochrome P450, family 2, subfamily c, polypeptide 65(Cyp2c65);cytochrome P450, fa…
		8.4e-09	Steroid hormone biosynthesis	Kegg_pathway	13
		2.4e-08	Monooxygenase	Up_keywords	13
3	2	0.045	Membrane	Up_keywords	78
4	2	0.018	Inflammatory response	Up-keywords	7	chemokine (C-C motif) ligand 19(Ccl19);complement component 4B (Chido blood group)(C4b) ;interleukin 1 receptor accessory protein(Il1rap);nuclear factor of kappa light polypeptide gene enhancer in B cells inhibitor, delta(Nfkbid);phosphatidylinositol 3-kinase catalytic delta polypeptide(Pik3cd);toll-like receptor 1(Tlr1) ;toll-like receptor 5(Tlr5)
		0.3	Toll-like receptor signaling pathway	Kegg_pathway	5
		0.3	Innate immunity	Up-keywords	6
5	1.66	0.05	Glycosyltransferase	Up-keywords	7	MFNG O-fucosylpeptide 3-beta-N-acetylglucosaminyltransferase(Mfng;UDP glucuronosyltransferase 1 family, polypeptide A6B(Ugt1a6b);UDP glucuronosyltransferase 2 family, polypeptide A3(Ugt2a3) ;UDP-Gal:betaGlcNAc beta 1,3-galactosyltransferase, polypeptide 5(B3galt5);UDP-GlcNAc:betaGal beta-1,3-N-acetylglucosaminyltransferase 6 (core 3 synthase)(B3gnt6);glycoprotein galactosyltransferase alpha 1, 3(…
		0.3	Signal-anchor	Up_keywords	8

## Sheet: SuppTable5
Cluster number	Enrichment score	Adjusted P-value	Ontology		Gene count	Genes
1	1.77	0.0018	Lipid metabolic process	Goterm_BP_direct	12	acetyl-Coenzyme A acyltransferase 1B (Acaa1b); acyl-CoA thioesterase 1 (Acot1); acyl-Co A thioesterase 3 (Acot3); carnitine O-octanoyl transferase (); peroxisome proliferator activated receptor alpha (Ppara); similar to DNA-directed RNA polymerase II 7.6k Da polypeptide (RPB10)(RPB7.6)(RPABC5); hypothetical protein LOC100044218; predicted gene 13015; polymerase (RNA) II (DNA); directed polypeptid…
		0.052	Lipid metabolism	Up_keywords	8
2	1.5	0.019	Biological rhythms	Up_keywords	5	D site albumin promoter binding protein (Dbp); hepatic leukemia factor (Hlf); CCR4 carbon catabolite repression 4-like (CCrn4l); thyrotroph embryonic factor (Tef)
		0.023	Rhythmic process	Goterm_BP_direct	5
3	1.44	0.0083	TGF-beta signaling pathway	Kegg_pathway	5	MAD homolog 7 (); MAD homolog 9 (); follistatin (Fst); inhibin beta E (Inhbe); inhibin beta-C (Inhbc)
4	1.35	0.0026	Glucose metabolic process	Goterm_BP_direct	5	peroxisome proliferator activated receptor alpha (Ppara); cytosolic phosphoenolpyruvate carboxykinase 1 (Pck1); phosphoglucomutase 2-like 1; phosphorylase kinase alpha 2 (Phka2); lactate dehydrogenase A (Ldha)
5	1.29	0.011	Cytochrome P450	Interpro	5	cytochrome P450 family 4 subfamily a polypeptide 31 (Cyp4a31); cytochrome P450 family 4 subfamily a polypeptide 32 (Cyp4a32); ;cytochrome P450 family 4 subfamily a polypeptide 10 (Cyp4a10); cytochrome P450 family 2 subfamily u polypeptide 1 (Cyp2u1); cytochrome P450 family 26 subfamily b polypeptide 1 (Cyp26b1); cytochrome P450 family 4 subfamily b polypeptide 1 (Cyp4b1)
		0.022	Monooxygenase	Up_keywords	5
